# Supplementary material for: Poststroke psychosis: a systematic review
Source: PubMed Central journal article supplement (PMC6204934; doi:10.1136/jnnp-2017-317327), 2018-01-13
Supplement: jnnp-2017-317327supp001.pdf [file jnnp-2017-317327supp001.pdf]

## Supplementary Material for

# Post-stroke psychosis: a systematic review

Helle Stangeland, Vasiliki Orgeta, Vaughan Bell

## Table of contents

### Methods

|                                        |   |
|----------------------------------------|---|
| Databases and search strategy          | 2 |
| Full search strategy                   | 2 |
| Data extraction and quality assessment | 3 |

### Results

|                                                                                |    |
|--------------------------------------------------------------------------------|----|
| Reasons for exclusion                                                          | 4  |
| Meta-analysis of prevalence                                                    | 5  |
| Quality assessment of the included case series and quantitative studies        | 7  |
| Characteristics of included single case reports                                | 8  |
| Characteristics of included case series and quantitative studies               | 17 |
| Items selected for the assessment of the quality of the included group studies | 24 |

### References

27

## Methods

### Databases and search strategy

CINAHL, MEDLINE and PsychINFO were electronically searched from January 1975 to December 2016. We judged the 1st of January 1975 to be a natural starting date for the search, as studies published prior to this date are unlikely to involve neuroimaging techniques that provide critical information for this type of research, i.e. CT scans. The final search was completed on 9 December 2016. The search strategy was limited to only include studies published in English and studies assessing human participants.

### Full search strategy

#### CINAHL (EBSCO), MEDLINE (OVID) and PsychINFO (OVID)

1. (((stroke or poststroke or post-stroke or cerebrovasc\* or "cerebral vasc\*" or CVA or apoplex\* or SAH or ischemic\* or ischaemic\* or hemorrhage\* or haemorrhage\* or "transient ischemic attack" or "transient ischaemic attack" or TIA) and (psychosis or psychotic or delus\* or hallucin\* or paranoi\* or schizophren\*)) not dementia).mp.

2. limit 1 to (english language and humans and yr="1975 -Current")

#### MEDLINE (OVID) example

#### Search strategy

1. stroke/
2. poststroke/
3. post-stroke/
4. cerebrovasc\$.tw.
5. cerebral vasc\$.tw.
6. CVA/
7. apoplex\$.tw.
8. SAH/
9. ischemic\$.tw.
10. ischaemic\$.tw.
11. hemorrhage\$.tw.
12. haemorrhage\$.tw.
13. 'transient ischemic attack' /
14. 'transient ischaemic attack'
15. TIA/
16. 1 or 2 or 3 or 4 or 5 or 6 or 7 or 8 or 9 or 10 or 11 or 12 or 13 or 14 or 15
17. psychosis/

18. psychotic/
19. delus\$.tw.
20. hallucin\$.tw.
21. paranoi\$.tw.
22. schizophren\$.tw.
23. 17 or 18 or 19 or 20 or 21 or 22
24. dementia/
- 25.16 and 23 not 24

### **Data extraction and quality assessment**

Two reviewers independently screened the titles and abstracts of the literature identified by the search strategy described above, excluding studies that did not meet the inclusion criteria. During this process any study whose eligibility could not be determined after having reviewed the title and abstract was obtained via full text format, and included in the next stage of the search process. The full text of the remaining studies were then screened by the same reviewers and again excluded if they did not meet the inclusion criteria. Any uncertainty or disagreement about the studies at this stage was discussed between the two reviewers in order to reach consensus, or with the third author.

Finally, two reviewers used a standardised extraction form to extract relevant data from the included studies. Data was extracted with respect to study design, patient setting and patient characteristics, including age and number of participants, and whether or not the participants had been diagnosed with a psychiatric disorder prior to having a stroke. Moreover, information regarding each study's inclusion and exclusion criteria, comparison group or condition, and diagnostic assessment was extracted. Specifically, information about stroke subtype, lesion location, as well as time of onset and description of psychosis was obtained. If a study explored treatment interventions the method for assessing treatment outcomes was also extracted, as was each study's primary outcome and other outcomes. No authors were contacted for additional information.

Quality assessment was conducted using a revised version of the STROBE checklist for evaluating observational studies. Ten items were adapted from the STROBE checklist as there is currently no consensus about what assessment tool is appropriate to use for qualitative studies. Each item was scored either "Yes" or "No" by two reviewers and a global score was calculated for each item. The quality assessment is available below.

## **Results**

### **Reasons for exclusion**

After having screened the titles and abstracts of the studies identified by the search strategy, 198 were identified as potentially eligible. Out of these, 122 studies were excluded after having been obtained the full text, as they did not meet the inclusion criteria for the review. 41 of these studies were excluded because they did not meet the inclusion criteria for psychosis. Typically these studies involved non-psychotic hallucinatory symptoms due to sensory impairments, such as Charles Bonnet syndrome, or delusions relating to body ownership or body awareness, such as somatoparaphrenia and anosognosia. A total of 35 studies were excluded because the causation between stroke and psychosis was unclear, for example where patients were presenting with a comorbid neurodegenerative disease. A further 18 studies were excluded because they did not involve psychosis, and 13 studies were excluded due to unclear psychosis definitions, such as symptoms presented being representative of affective disorders rather than psychosis. We excluded 6 studies because they did not involve stroke pathology and 5 studies because they did not include CT or MRI scans to verify a diagnosis of stroke. Finally, 3 studies were excluded because they were reviews and did not report any original data, and 1 study was a personal account.

### **Meta-analysis of prevalence**

Three studies reported prevalence of delusions and hallucinations in stroke patients. Kumral and Öztürk (2004) reported on delusions in a sample of acute stroke patients, Buijck et al (2011) reported prevalence rates for delusions and hallucination on admission and discharge in a sample of geriatric patients admitted for stroke rehabilitation, and van Almenkerk et al (2012) reported prevalence rates of delusions and hallucinations in a sample of institutionalized stroke patients. To estimate cross-sectional prevalence we only included prevalence at the point of admission from Buijck et al (2011).

It is worth noting differences in the included studies. Buijck et al (2011), van Almenkerk et al (2012) and Wong et al (2016) used the Neuropsychiatric Inventory Questionnaire to assess symptoms in patients admitted for stroke rehabilitation, or in the case of Wong et al (2016), patients admitted acutely but assessed 3-6 months after stroke and in the rehab phase, whereas Kumral and Öztürk (2004) reported ratings of delusions from clinical judgment based on DSM-IV criteria in patients admitted for acute stroke treatment.

Data from these studies were analysed using the *meta* package (version 4.8.4) for *R* statistics (version 3.4.2) on a 64-bit linux x86 platform. Freeman-Tukey double arcsine transformation was used to calculate the weighted summary proportion under the fixed and random effects models with normal approximation confidence intervals for individual studies. The *R* analysis script and data have been made freely available on Open Science Framework archive for this analysis: <https://osf.io/kzht6/>

The formal test of heterogeneity for data included in the analysis was significant. Because of this, estimated prevalence was based on more conservative estimates from the random effects model throughout. Results from this meta-analysis are reported in Figure 2 of the main manuscript.

Because of the methodological differences in Kumral and Öztürk (2004) and concerns about adequate screening for patients with alterations in their levels of consciousness, not least because they various report patients with agitation and two specifically with confusional states, we also

report meta-analytic results with this study removed, using the same methods, in Figure S1 below, leading to very similar estimates of prevalence.

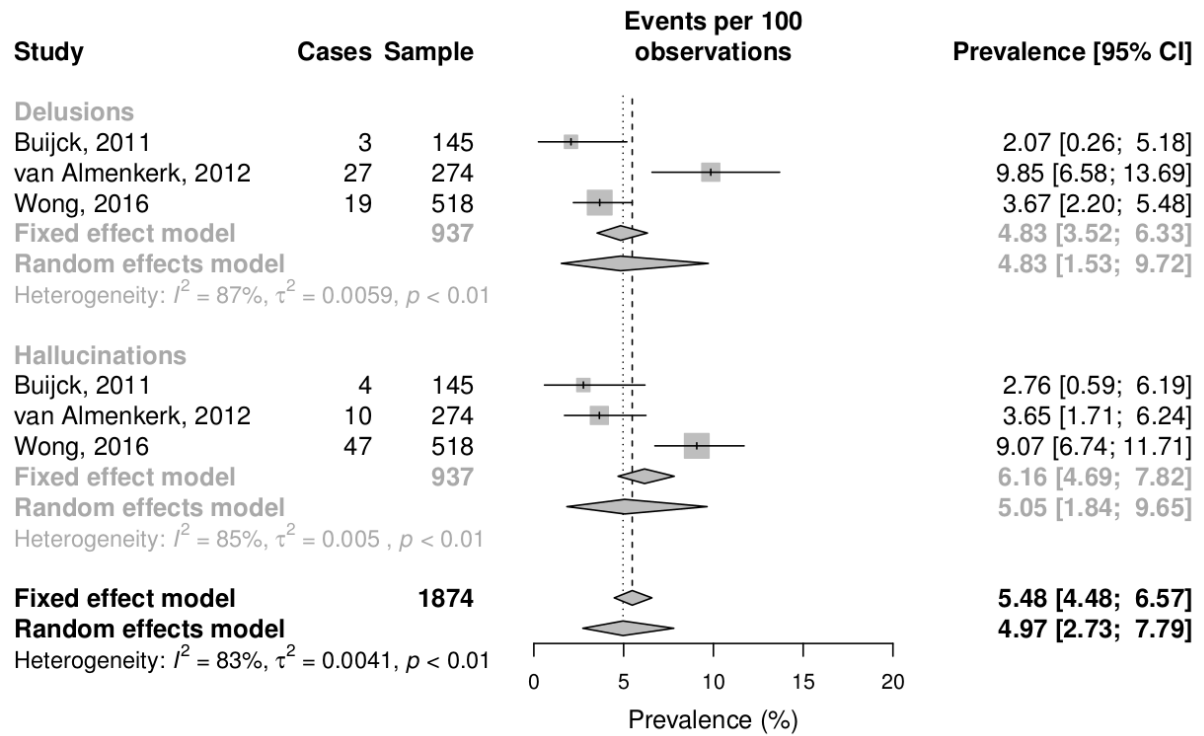

**Figure S1.** Forest plot of post-stroke delusion and hallucination prevalence with Kumral and Öztürk (2004) removed

### **Quality assessment of the case series and quantitative studies**

All of the 18 studies included an adequate description of the setting and location of the studies, and specified the eligibility criteria and sources and methods for the selection of the participants. A total of 13 (72.2%) studies included definitions of psychosis as measured by diagnostic criteria, and 6 (33.3%) specified the diagnostic criteria used to diagnose stroke. In 11 (61.1%) of the studies stroke data were obtained from a patient or proxy, whereas in 7 (38.9%) stroke data was collected from a database. A total of 11 (61.1%) studies clearly defined their neuroimaging findings, and 3 (75%) of the eligible studies included a blinded investigator. We found that 17 (94.4%) of the studies adequately reported the number of participants at each stage of the study. All of the studies reported appropriate descriptive and outcome data. Finally, 6 (50%) of the eligible studies provided unadjusted estimates and their precision (e.g. 95% confidence interval) in their main results. Full results are displayed in Table 3.

**Table 1. Characteristics of included single case reports**

H = Haemorrhagic; I = Ischaemic; n/a = Not available; CBT\* = Cognitive Behavioural Therapy

| Reference                      | Age/Sex | Stroke | Psychosis type                                           | Onset | Lesion                                            | Treatment               | Outcome            |
|--------------------------------|---------|--------|----------------------------------------------------------|-------|---------------------------------------------------|-------------------------|--------------------|
| Akinci, Oncu & Topcular (2016) | 61/M    | I      | Persecutory delusions and tactile hallucinations         | n/a   | Right temporo-parietal-occipital region           | n/a                     | Partial resolution |
| Almeida et al. (2011)          | 20/F    | H      | Schizophrenia- like                                      | 1y    | Right cerebellar hemisphere                       | Clozapine, valporate    | Partial resolution |
| Anderson et al. (1998)         | 48/F    | H      | Erotomania                                               | 4y    | Right fronto-parietal region                      | Risperidone, sertraline | n/a                |
| Barboza et al. (2013)          | 54/F    | I      | Persecutory delusions                                    | 1y    | Right fronto-temporo-parietal region              | Quetiapine              | Partial resolution |
| Bieganska & Janic (2015)       | 70/M    | I      | Paranoid delusions of reference and delusions of control | n/a   | Right putamen, corona radiata and caudate nucleus | n/a                     | n/a                |
| Bouckoms et al. (1986)         | 66/F    | H      | Capgras syndrome                                         | n/a   | Right frontal region                              | None                    | Partial resolution |



|                              |      |   |                                                                         |      |                                                                   |                                                          |                     |
|------------------------------|------|---|-------------------------------------------------------------------------|------|-------------------------------------------------------------------|----------------------------------------------------------|---------------------|
| Celik et al. (2004)          | 69/F | I | Mania with mood congruent psychotic symptoms                            | 2d   | Right temporo-parietal region                                     | Carbamazepine                                            | Partial resolution  |
| Chae et al. (2006)           | 63/M | I | Othello syndrome                                                        | 3.5y | Right fronto-parietal region and right basal ganglia              | Quetiapine, zolpidem                                     | Partial resolution  |
| Chiu (1995)                  | 78/F | H | Auditory and sensory hallucinations and secondary persecutory delusions | 10d  | Right occipital lobe and right superior-posterior parietal region | Haloperidol                                              | Complete resolution |
| Crail-Melendez et al. (2013) | 37/F | I | Schizophrenia-like                                                      | n/a  | Right thalamus                                                    | Risperidone                                              | Complete resolution |
| Das et al. (2005)            | 65/F | I | Erotomania                                                              | n/a  | Fronto-temporal region, unspecified                               | Olanzapine and psycho-therapy                            | Partial resolution  |
| Dayus & van den Broek (2000) | 42/M | H | Stable delusional confabulations                                        | n/a  | Right caudate nucleus                                             | Sulpiride, fluoxetine and self-monitoring training (SMT) | Partial resolution  |

|                                |      |   |                                                    |     |                                                                     |             |                     |
|--------------------------------|------|---|----------------------------------------------------|-----|---------------------------------------------------------------------|-------------|---------------------|
| Delgado & Bogousslavsky (2013) | 48/F | I | Auditory distortions                               | n/a | Bilateral thalamus (predominating right dorsomedial nucleus region) | None        | Complete resolution |
| Dhasmana et al. (2010)         | 28/F | I | Psychosis, unspecified                             | 1w  | Left transverse sinus                                               | None        | Complete resolution |
| Floris et al. (2008)           | 70/M | H | Delusional parasitosis and visual hallucinations   | 5m  | Left fronto-parietal region                                         | Olanzapine  | Partial resolution  |
| Flynn et al. (1989)            | 67/M | I | Delusional parasitosis and auditory hallucinations | n/a | Right fronto-parietal region                                        | Amoxapine   | No improvement      |
| Fonseca et al. (2013)          | 72/M | I | Cotard's syndrome                                  | 2m  | Right fronto-temporo-parietal region                                | None        | Complete resolution |
| Gnanavel (2013)                | 8/M  | I | Paranoid delusions and auditory hallucinations     | n/a | Left fronto-temporo-parietal region                                 | Risperidone | Partial resolution  |
| Hanihara et al. (2009)         | 64/F | I | Delusional parasitosis                             | 3m  | Right cerebellum and left thalamic region                           | Sulpiride   | Partial resolution  |

|                                 |      |     |                                                 |     |                                                      |                                              |                     |
|---------------------------------|------|-----|-------------------------------------------------|-----|------------------------------------------------------|----------------------------------------------|---------------------|
| Hinkebein et al. (2001)         | 67/M | H   | Reduplicative paramnesia                        | 2w  | Right fronto-temporo-parietal region                 | Family psycho-education, CBT                 | Partial resolution  |
| Hudson et al. (2000)            | 71/F | I   | Fregoli syndrome and reduplicative paramnesia   | 1w  | Right temporal region                                | n/a                                          | n/a                 |
| Jocic et al. (1993)             | 67/M | I   | Fregoli's syndrome and reduplicative paramnesia | 15d | Right fronto-temporal region and right basal ganglia | Nortriptyline                                | Partial resolution  |
| Kato et al. (2006)              | 64/F | I   | Somatic delusions                               | 4y  | Right caudate nucleus                                | Antipsychotic drugs, unspecified             | No improvement      |
| Kitabayashi et al. (2006)       | 40/F | I   | Schizophrenia-like                              | n/a | Right putamen, caudate and insula                    | Risperidone                                  | Complete resolution |
| Klasen, Britton & Newman (1999) | 12/M | I   | Schizophrenia-like                              | n/a | Left basal ganglia region                            | Diazepam, chlorpromazine and trifluoperazine | Complete resolution |
| Lee et al. (2011)               | 69/M | n/a | Reduplicative paramnesia                        | 2m  | Right frontal region and right caudate nucleus       | n/a                                          | No improvement      |

|                             |                    |              |                                                        |                  |                                                                              |                                                           |                                     |
|-----------------------------|--------------------|--------------|--------------------------------------------------------|------------------|------------------------------------------------------------------------------|-----------------------------------------------------------|-------------------------------------|
| Leeds<br>et al. (2011)      | 71/F               | I            | Cotard's syndrome                                      | n/a              | Right thalamus                                                               | Antipsychotic<br>drugs, unspecified                       | Complete<br>resolution              |
| Meguro<br>et al. (2012)     | 77/M               | I            | Erotomania and Othello<br>syndrome                     | n/a              | Left head of the<br>caudate nucleus                                          | Risperidone,<br>levomepromazine                           | Partial resolution                  |
| Mishra<br>et al. (2008)     | 42/M               | I            | Paranoid delusions and visual<br>hallucinations        | 2y               | Bilateral occipital<br>region                                                | Phenytoin sodium,<br>sodium valporate                     | n/a                                 |
| Mittal & Khan<br>(2010)     | 19/F               | I            | Paranoid delusions and auditory<br>hallucinations      | n/a              | Left ventro-anterior<br>thalamic nucleus                                     | Haloperidol,<br>olanzapine,<br>risperidone and<br>aspirin | 1: Died from<br>complications       |
| Mobbs<br>et al. (2001)      | 1: 34/M<br>2: 59/F | 1: H<br>2: H | 1: Thought disorder<br>2: Persecutory delusions        | 1: n/a<br>2: n/a | 1: n/a<br>2: n/a                                                             | 1: None<br>2: None                                        | 1: n/a<br>2: Complete<br>resolution |
| Moriyama<br>et al. (2007)   | 68/F               | I            | Fregoli syndrome                                       | 2m               | Right temporo-<br>occipital region                                           | Risperidone                                               | Complete<br>resolution              |
| Nagaratnam<br>et al. (2000) | 1: 69/F<br>2: 65/F | 1: I<br>2: I | 1: Delusional parasitosis<br>2: Delusional parasitosis | 1: 6m<br>2: 3w   | 1: Left temporo-<br>occipital region<br>2: Left temporo-<br>occipital region | n/a                                                       | n/a                                 |

|                        |      |     |                                                   |     |                                       |                                                                                        |                     |
|------------------------|------|-----|---------------------------------------------------|-----|---------------------------------------|----------------------------------------------------------------------------------------|---------------------|
| Narumoto et al. (2005) | 55/F | I   | Persecutory delusions and visual hallucinations   | n/a | Bilateral head of the caudate nucleus | Haloperidol                                                                            | Partial resolution  |
| Narumoto et al. (2006) | 82/F | I   | Delusional parasitosis and visual hallucinations  | 1m  | Right temporo-parietal region         | Risperidone                                                                            | Complete resolution |
| Neetesh et al. (2012)  | 49/F | H   | Othello syndrome                                  | 2m  | Right basal ganglia                   | Risperidone                                                                            | Complete resolution |
| Ohara et al. (2006)    | 56/F | n/a | Auditory hallucinations                           | 4m  | Left temporal and parietal region     | Haloperidol                                                                            | Complete resolution |
| Ortiz et al. (2004)    | 30/M | I   | Depression with mood congruent psychotic symptoms | n/a | Left para-hippocampal gyrus           | Clomipramine, citalopram, venlafaxine, haloperidol, risperidone, clozapine, olanzapine | Partial resolution  |
| Pakalnis et al. (1987) | 52/F | I   | Capgras syndrome and visual hallucinations        | 1d  | Right parieto-occipital region        | Haloperidol                                                                            | Complete resolution |

|                                           |                    |              |                                                                         |                |                                                                                                  |                                                                   |                                                        |
|-------------------------------------------|--------------------|--------------|-------------------------------------------------------------------------|----------------|--------------------------------------------------------------------------------------------------|-------------------------------------------------------------------|--------------------------------------------------------|
| Peckins,<br>Khorashadi &<br>Wolpow (2016) | 88/F               | I            | Reduplicative paramnesia                                                | 8d             | Medial right<br>thalamus                                                                         | n/a                                                               | Complete<br>resolution                                 |
| Perez<br>et al. (2014)                    | 73/F               | H            | Cotard's syndrome                                                       | n/a            | Right fronto-<br>parietal region                                                                 | Levetiracetam                                                     | Complete<br>resolution                                 |
| Richardson<br>et al. (1991)               | 68/M               | I            | Othello syndrome                                                        | 2m             | Right fronto-<br>temporo-parietal<br>region                                                      | Haloperidol,<br>phenytoin, and<br>sexual counseling               | No improve-<br>ment                                    |
| Richardson<br>(1992)                      | 64/M               | I            | Unspecified delusions and visual<br>hallucinations                      | n/a            | Right temporo-<br>parieto-occipital<br>region and left<br>cerebellum                             | Haloperidol                                                       | Partial resolution                                     |
| Rocha<br>et al. (2014)                    | 1: 65/M<br>2: 69/M | 1: I<br>2: I | 1: Othello syndrome and<br>persecutory delusions<br>2: Othello syndrome | 1: 1w<br>2: 1d | 1: Right temporo-<br>parieto-insular<br>region<br>2: Right temporo-<br>parieto-insular<br>region | 1: Fluvoxamine,<br>chlorpromazine<br>2: Quetiapine,<br>sertraline | 1: Complete<br>resolution<br>2: Complete<br>resolution |

|                           |                    |              |                                                                                                                         |                  |                                                 |                                                                                         |                                                        |
|---------------------------|--------------------|--------------|-------------------------------------------------------------------------------------------------------------------------|------------------|-------------------------------------------------|-----------------------------------------------------------------------------------------|--------------------------------------------------------|
| Routh & Hill<br>(2014)    | 83/M               | H            | Mania with paranoid delusions                                                                                           | n/a              | Right posterior<br>thalamus region              | Olanzapine                                                                              | Complete<br>resolution                                 |
| Santos<br>et al. (2009)   | 1: 67/M<br>2: 49/M | 1: I<br>2: I | 1: Delusions of self-reference<br>and persecutory delusions<br>2: Gustatory hallucinations and<br>persecutory delusions | 1: n/a<br>2: n/a | 1: Right caudate<br>nucleus<br>2: Left thalamus | 1: Quetiapine,<br>benzodiazepines,<br>unspecified<br>2: Quetiapine and<br>psychotherapy | 1: Complete<br>resolution<br>2: Complete<br>resolution |
| Schnider et al.<br>(1993) | 54/M               | n/a          | Mania with mood congruent<br>psychotic symptoms                                                                         | n/a              | Right temporo-<br>parieto-occipital<br>region   | n/a                                                                                     | Partial resolution                                     |
| Small (2016)              | 57/F               | I            | Visual and tactile hallucinations                                                                                       | 2y               | Pontine region                                  | Quetiapine                                                                              | Complete<br>resolution                                 |
| Sottile<br>et al. (2015)  | 30/F               | I            | Capgras syndrome and Cotard's<br>syndrome                                                                               | n/a              | Left temporo-<br>parietal region                | Olanzapine and<br>psychotherapy                                                         | Complete<br>resolution                                 |
| Spiegel<br>et al. (2008)  | 54/F               | I            | Capgras syndrome                                                                                                        | 1w               | Right frontal<br>region                         | Mirtazepine,<br>ziprasidone                                                             | Partial resolution                                     |
| Suhr<br>et al. (1998)     | 52/F               | I            | Unspecified delusions and<br>auditory hallucinations                                                                    | 10y              | Right temporo-<br>parieto-occipital<br>region   | Phenytoin,<br>psychoeducation<br>and CBT*                                               | Partial resolution                                     |

|                          |      |   |                                                              |     |                                   |                          |                     |
|--------------------------|------|---|--------------------------------------------------------------|-----|-----------------------------------|--------------------------|---------------------|
| Thiel et al. (2014)      | 70/F | H | Capgras syndrome                                             | n/a | Right frontal region              | n/a                      | n/a                 |
| Villarejo et al. (2011)  | 90/M | I | Mirrored-self misidentification and reduplicative paramnesia | 1w  | Right frontal region              | None                     | No improvement      |
| Westlake & Weeks (1999)  | 20/F | H | Depression with Othello syndrome                             | 5y  | Right parietal and frontal region | Paroxetine               | Partial resolution  |
| Wong et al. (1997)       | 72/M | I | Othello syndrome                                             | 1d  | Right caudate nucleus and putamen | Nortriptyline            | Partial resolution  |
| Wunderlich et al. (2000) | 24/F | I | Visual hallucinations                                        | 2w  | Parietal-occipital cortex         | None                     | Complete resolution |
| Yildiz et al. (2007)     | 56/M | H | Schizophrenia-like                                           | 6m  | Left fronto-parietal region       | Diazepam and haloperidol | Partial resolution  |
| Zimnitzky et al. (1996)  | 19/M | I | Schizophrenia-like                                           | n/a | n/a                               | Risperidone              | Partial resolution  |



**Table 2. Characteristics of included case series and quantitative studies**

NPS\* = Neuropsychiatric symptoms; n/a = Not available; RC = retrospective cohort study; PC = prospective cohort study; CS = case series; CrS = cross sectional study

| <b>Reference</b>     | <b>Study design</b> | <b>Setting</b>                 | <b>Sample</b>                                                   | <b>Exclusion</b>                                                                                                    | <b>Comparator</b>                       | <b>Primary outcome</b>                               |
|----------------------|---------------------|--------------------------------|-----------------------------------------------------------------|---------------------------------------------------------------------------------------------------------------------|-----------------------------------------|------------------------------------------------------|
| Almeida (2007)       | RC                  | Community, Australia           | Stroke survivors with a first ever stroke in 1990 (N = 1008)    | Previous psychiatric disorder                                                                                       | Matched controls without NPS* (N = 287) | Incidence and 10-year mortality of NPS* after stroke |
| Buijck et al. (2012) | PC                  | Nursing homes, The Netherlands | Geriatric patients admitted for stroke rehabilitation (N = 145) | Unwillingness to give informed consent, legally incapable, expected to be discharged within 2 weeks, critically ill | n/a                                     | Prevalence and course of NPS* after stroke           |

|                      |    |                           |                                                |                                                                                                 |                                                 |                                                                        |
|----------------------|----|---------------------------|------------------------------------------------|-------------------------------------------------------------------------------------------------|-------------------------------------------------|------------------------------------------------------------------------|
| Devine et al. (2014) | CS | Hospital, London          | Patients with post-stroke psychosis (N = 3)    | n/a                                                                                             | Patients with similar anatomical damage (N = 9) | To identify the neuroanatomical basis of psychosis following stroke    |
| Flint et al. (1991)  | CS | Hospital, Canada          | Patients with late-onset paraphrenia (N = 21)  | Previous psychiatric history of psychosis or affective disorders, comorbid neurological disease | Patients with late-onset paranoia (N = 12)      | To determine the course of late-onset paranoia compared to paraphrenia |
| Giltay et al. (2006) | RC | Hospital, The Netherlands | Patients undergoing cardiac surgery (N = 8139) | n/a                                                                                             | Patients without psychotic symptoms (N = 7971)  | Presence of psychotic symptoms after cardiac surgery                   |

|                         |    |                                         |                                                             |                                                                                                                                                                                   |                                                  |                                                                                                                                    |
|-------------------------|----|-----------------------------------------|-------------------------------------------------------------|-----------------------------------------------------------------------------------------------------------------------------------------------------------------------------------|--------------------------------------------------|------------------------------------------------------------------------------------------------------------------------------------|
| Hoffmann<br>(2008)      | CS | Stroke<br>registry,<br>United<br>States | Isolated right<br>temporal stroke<br>patients (N = 5)       | Extratemporal<br>involvement by the<br>lesion, coma,<br>cerebral trauma,<br>encephalopathy,<br>substance abuse,<br>neurodegenerative<br>disease,<br>medication related<br>effects | Isolated left temporal<br>stroke patients (N= 5) | Prevalence of temporal and<br>frontal cognitive and<br>neuropsychiatric syndromes in<br>isolated right and left stroke<br>patients |
| Kumral<br>et al. (2004) | CS | Hospital,<br>Turkey                     | First ever<br>stroke patients<br>with delusions<br>(N = 15) | Previous<br>psychiatric<br>disorder, substance<br>abuse, transient<br>and intermittent<br>behavioural<br>abnormality after a<br>seizure                                           | n/a                                              | To define delusional themes and<br>anatomical patterns of delusions<br>after stroke                                                |

|                         |    |                                                |                                                                             |                                                                                                          |                                                                         |                                                                                                  |
|-------------------------|----|------------------------------------------------|-----------------------------------------------------------------------------|----------------------------------------------------------------------------------------------------------|-------------------------------------------------------------------------|--------------------------------------------------------------------------------------------------|
| Levine et al. (1984)    | CS | Hospital, United States                        | Stroke patients with right cerebral infarcts and delusions (N = 9)          | Comorbid neurological disease, medication related effects, congestive heart failure, respiratory failure | Stroke patients with right cerebral infarcts without delusions (N = 16) | To identify the nature and causes of delusions after infarction of the right cerebral hemisphere |
| McMurtray et al. (2008) | CS | Veterans memory disorder clinic, United States | Patients with content-specific delusions after right caudate stroke (N = 8) | Previous psychiatric and medical conditions that could affect cognition, medication related effects      | Matched controls without stroke or delusions (N = 8)                    | Association with prefrontal hypometabolism                                                       |

|                        |    |                         |                                                                            |                                                                                |                                                                                       |                                                                   |
|------------------------|----|-------------------------|----------------------------------------------------------------------------|--------------------------------------------------------------------------------|---------------------------------------------------------------------------------------|-------------------------------------------------------------------|
| Murai et al. (1997)    | CS | Hospital, Japan         | Patients with focal brain damage and reduplicative paramnesia (N = 6)      | No CT or MRI, previous psychiatric disorder, severe communication disturbances | n/a                                                                                   | To identify the prevalence and course of reduplicative paramnesia |
| Price & Mesulam (1985) | CS | Hospital, United States | Right-handed patients with right hemisphere infarcts and psychosis (N = 5) | n/a                                                                            | n/a                                                                                   | Clinical features of psychosis due to cerebrovascular disease     |
| Rabins et al. (1991)   | CS | Hospital, United States | Patients with post-stroke psychosis (N = 5)                                | Previous psychiatric history of psychosis                                      | Patients with the same lesion size and location without post-stroke psychosis (N = 5) | Risk factors for developing post-stroke psychosis                 |

|                                                           |     |                                |                                                                          |                                                                                                |     |                                                                                                 |
|-----------------------------------------------------------|-----|--------------------------------|--------------------------------------------------------------------------|------------------------------------------------------------------------------------------------|-----|-------------------------------------------------------------------------------------------------|
| Ramirez-Bermudez, Espinola-Nadurille & Loza-Taylor (2010) | CS  | Hospital, Mexico               | Patients with neurological disease and delusional parasitosis (N = 4)    | Patients without neurological disease                                                          | n/a | Clinical features and response to treatment                                                     |
| Su et al. (2001)                                          | CS  | Hospital, Taiwan               | Patients with delusional disorder due to cerebrovascular disease (N = 7) | Previous psychiatric history or other non-vascular cortical/subcortical neurological disorders | n/a | Clinical features and MRI characteristics of delusional disorder due to cerebrovascular disease |
| van Almenkerk et al. (2012)                               | CrS | Nursing homes, The Netherlands | Stroke patients admitted for stroke rehabilitation (N = 274)             | Incomplete questionnaires                                                                      | n/a | Status of functioning and stroke characteristics                                                |

|                             |     |                                |                                                                   |                                                             |                                          |                                                                                     |
|-----------------------------|-----|--------------------------------|-------------------------------------------------------------------|-------------------------------------------------------------|------------------------------------------|-------------------------------------------------------------------------------------|
| van Almenkerk et al. (2015) | CrS | Nursing homes, The Netherlands | Stroke patients admitted for stroke rehabilitation (N = 274)      | Incomplete questionnaires                                   | n/a                                      | Prevalence of pain and its relation to emotional distress and low social engagement |
| Wong et al. (2016)          | CrS | Hospital, Hong Kong            | TIA and stroke patients 3–6 months post index admission (N = 518) | History of dementia, not able to complete cognitive testing | n/a                                      | Neuropsychiatric Inventory, cognitive function, amyloid imaging                     |
| Zhang et al. (2015)         | RC  | Hospital, China                | Ischaemic stroke patients one year after hemiplegia (N = 90)      | n/a                                                         | Matched controls without stroke (N = 90) | To measure psychological distress, social support and medication adherence          |

**Table 3. Items selected for the assessment of the quality of the included group studies**

---

| <b>Methods</b>              |                                                                                                                                                                    |
|-----------------------------|--------------------------------------------------------------------------------------------------------------------------------------------------------------------|
| Setting                     | Description of the setting, locations, and relevant dates, including periods of recruitment, exposure, follow-up, and data collection.                             |
| Participants                | The eligibility criteria, and the sources and methods of selection of participants.<br>For matched studies, matching criteria and the number of controls per case. |
| Variables                   | Definition of psychosis and stroke (including diagnostic criteria, if applicable).                                                                                 |
| Data source and measurement | a. Method for collecting stroke data (directly from the patient or database).<br>b. Clearly defined CT/MRI measures.<br>c. Investigator blinded to patient status. |

---

| <b>Results</b>   |                                                                                                                                                                                                           |
|------------------|-----------------------------------------------------------------------------------------------------------------------------------------------------------------------------------------------------------|
| Participants     | Report numbers of individuals at each stage of study—eg numbers potentially eligible, examined for eligibility, confirmed eligible, included in the study, completing follow-up, and analysed             |
| Descriptive data | Give characteristics of study participants (eg demographic, clinical, social) and information on exposures and potential confounders.                                                                     |
| Outcome data     | Report numbers of outcome events or summary measures.                                                                                                                                                     |
| Main results     | Give unadjusted estimates and, if applicable, confounder-adjusted estimates and their precision (eg, 95% confidence interval). Make clear which confounders were adjusted for and why they were included. |

---



| Studies                | Setting and location | Sources and methods for selection of participants | Data sources and measurement  |                                   |                     |                      | Participants | Descriptive data | Outcome data | Main results |
|------------------------|----------------------|---------------------------------------------------|-------------------------------|-----------------------------------|---------------------|----------------------|--------------|------------------|--------------|--------------|
|                        |                      |                                                   | Psychosis and stroke measures | Method for collecting stroke data | CT and MRI measures | Investigator blinded |              |                  |              |              |
| Almeida (2007)         | Yes                  | Yes                                               | P: Yes<br>S: Yes              | Database                          | No                  | N/A                  | Yes          | Yes              | Yes          | Yes          |
| Buijck (2012)          | Yes                  | Yes                                               | P: Yes<br>S: No               | Patient                           | No                  | N/A                  | Yes          | Yes              | Yes          | N/A          |
| Devine (2014)          | Yes                  | Yes                                               | P: No<br>S: No                | Database                          | Yes                 | N/A                  | Yes          | Yes              | Yes          | N/A          |
| Flint (1991)           | Yes                  | Yes                                               | P: Yes<br>S: No               | Patient                           | Yes                 | Yes                  | Yes          | Yes              | Yes          | No           |
| Giltay et al. (2006)   | Yes                  | Yes                                               | P: No<br>S: No                | Database                          | No                  | N/A                  | Yes          | Yes              | Yes          | Yes          |
| Hoffmann (2008)        | Yes                  | Yes                                               | P: Yes<br>S: Yes              | Database                          | Yes                 | Yes                  | Yes          | Yes              | Yes          | Yes          |
| Kumral (2004)          | Yes                  | Yes                                               | P: Yes<br>S: Yes              | Patient                           | Yes                 | N/A                  | Yes          | Yes              | Yes          | No           |
| Levine (1984)          | Yes                  | Yes                                               | P: No<br>S: No                | Patient                           | No                  | N/A                  | Yes          | Yes              | Yes          | No           |
| McMurtray (2008)       | Yes                  | Yes                                               | P: No<br>S: Yes               | Database                          | No                  | N/A                  | Yes          | Yes              | Yes          | No           |
| Murai (1997)           | Yes                  | Yes                                               | P: Yes<br>S: No               | Patient                           | Yes                 | No                   | Yes          | Yes              | Yes          | N/A          |
| Price & Mesulam (1985) | Yes                  | Yes                                               | P: No<br>S: No                | Patient                           | Yes                 | N/A                  | Yes          | Yes              | Yes          | N/A          |
| Rabins (1991)          | Yes                  | Yes                                               | P: Yes<br>S: No               | Patient                           | Yes                 | Yes                  | Yes          | Yes              | Yes          | No           |

|                                                           |     |     |                    |                                              |      |     |      |     |     |     |
|-----------------------------------------------------------|-----|-----|--------------------|----------------------------------------------|------|-----|------|-----|-----|-----|
| Ramirez-Bermudez, Espinola-Nadurille & Loza-Taylor (2010) | Yes | Yes | P: Yes<br>S: No    | Database                                     | Yes  | N/A | Yes  | Yes | Yes | N/A |
| Su et al. (2001)                                          | Yes | Yes | P: Yes<br>S: No    | Database                                     | Yes  | N/A | Yes  | Yes | Yes | N/A |
| van Almenkerk (2012)                                      | Yes | Yes | P: Yes<br>S: No    | Proxy                                        | No   | N/A | Yes  | Yes | Yes | Yes |
| van Almenkerk (2015)                                      | Yes | Yes | P: Yes<br>S: No    | Proxy                                        | No   | N/A | Yes  | Yes | Yes | Yes |
| Wong et al. (2016)                                        | Yes | Yes | P: Yes<br>S: Yes   | Patient                                      | Yes  | N/A | Yes  | Yes | Yes | Yes |
| Zhang et al. (2015)                                       | Yes | Yes | P: Yes<br>S: Yes   | Patient                                      | Yes  | N/A | No   | Yes | Yes | No  |
| <b>Total (%)</b>                                          | 100 | 100 | P: 72.2<br>S: 33.3 | Database:<br>38.9<br>Patient/ proxy:<br>61.1 | 61.1 | 75  | 94.4 | 100 | 100 | 50  |

## References

- Akinci E, Oncu F, Topcular B. Tactile hallucination and delusion following acute stroke: a case report. *Dusunen Adam*. 2016;29(1),79.
- Almeida J, Serrao EM, Almeida AT, Afonso JG. Effective treatment with clozapine and valproate for refractory schizophrenia-like psychosis after cerebellar hemorrhage. *Clinical neuropharmacology*. 2011;34(3):131-132.
- Almeida OP, Xiao J. Mortality associated with incident mental health disorders after stroke. *Australian and New Zealand Journal of Psychiatry*. 2007;41(3):274-281.
- Anderson CA, Camp J, Filley CM. Erotomania after aneurysmal subarachnoid hemorrhage. *The Journal of neuropsychiatry and clinical neurosciences*. 1998.
- Barboza RB, De Freitas GR, Tovar-Moll F, Fontenelle LF. Delayed-onset post-stroke delusional disorder: A case report. *Behavioural neurology*. 2013;27(3):287-291.
- Biegańska JM, Janik B. Usefulness of diagnostic models in the process of qualifying thought contents as delusional: case analysis. *Archives of Psychiatry and Psychotherapy*. 2015;2,5-12.
- Bouckoms A, Martuza R, Henderson M. Capgras syndrome with subarachnoid hemorrhage. *The Journal of nervous and mental disease*. 1986;174(8):484-488.
- Buijck BI, Zuidema SU, Eijk M, Geurts AC, Koopmans RT. Neuropsychiatric symptoms in geriatric patients admitted to skilled nursing facilities in nursing homes for rehabilitation after stroke: a longitudinal multicenter study. *International journal of geriatric psychiatry*. 2011;27(7): 734-741.
- Celik Y, Erdogan E, Tuglu C, Utku U. Post-stroke mania in late life due to right temporoparietal infarction. *Psychiatry and clinical neurosciences*. 2004;58(4),446-447.
- Chae BJ, Kang BJ. Quetiapine for hypersexuality and delusional jealousy after stroke. *Journal of clinical psychopharmacology*. 2006;26(3):331-332.
- Chiu HF. Poststroke psychosis. *The British journal of clinical practice*. 1995;49(5), 277- 277.
- Craill-Melendez D, Atriano-Mendieta C, Carrillo-Meza R, Ramirez-Bermudez J. Schizophrenia-like psychosis associated with right lacunar thalamic infarct. *Neurocase*. 2013;19(1):22-26.
- Das A, Mathur S, Orrell M. Erotomania secondary to cerebrovascular accident in frontotemporal impairment. *Irish journal of psychological medicine*. 2005;22(03):113-114.
- Dayus B, Van den Broek MD. Treatment of stable delusional confabulations using self- monitoring training. *Neuropsychological Rehabilitation*. 2000;10(4), 415-427.

- Delgado MG, Bogousslavsky J. 'Distorteidolias'-Fantastic Perceptive Distortion. *European neurology*. 2013;70(1-2), 6-9.
- Devine MJ, Bentley P, Jones B, Hotton G, Greenwood RJ, Jenkins, et al. The role of the right inferior frontal gyrus in the pathogenesis of post-stroke psychosis. *Journal of neurology*. 2014;261(3):600-603.
- Dhasmana DJ, Brockington IF, Roberts A. Post-partum transverse sinus presenting as acute psychosis. *Archives of women's mental health*. 2010;13(4):365-367.
- Flint AJ, Rifat SL, Eastwood MR. Late-onset paranoia: Distinct from paraphrenia?. *International Journal of Geriatric Psychiatry*. 1991;6(2):103-109.
- Floris G, Cannas A, Melis M, Solla P, Marrosu MG. Pathological gambling, delusional parasitosis and adipsia as a post-haemorrhagic syndrome: a case report. *Neurocase*. 2008;14(5):385-389.
- Flynn FG, Cummings JL, Scheibel J, Wirshing W. Monosymptomatic delusions of parasitosis associated with ischemic cerebrovascular disease. *Journal of geriatric psychiatry and neurology*. 1989;2(3):134-139.
- Fonseca AC, Pinho e Melo T, Ferro JM. Cotard delusion after stroke. *European Journal of Neurology*. 2013;20(7):e98-e99.
- Giltay EJ, Huijskes RV, Kho KH, Blansjaar BA, Rosseel PM. Psychotic symptoms in patients undergoing coronary artery bypass grafting and heart valve operation. *European journal of cardio-thoracic surgery*. 2006;30(1),140-147.
- Gnanavel S. Poststroke psychosis in an 8-year-old child with moyamoya disease. *BMJ case reports*. 2013;bcr2013201771.
- Hanihara T, Takahashi T, Washizuka S, Ogihara T, Kobayashi M. Delusion of oral parasitosis and thalamic pain syndrome. *Psychosomatics*. 2009;50(5):534-537.
- Hinkebein JH, Callahan CD, Gelber D. Reduplicative paramnesia: Rehabilitation of content-specific delusion after brain injury. *Rehabilitation Psychology*. 2001;46(1):75.
- Hoffmann M. Isolated right temporal lobe stroke patients present with Geschwind Gastaut syndrome, frontal network syndrome and delusional misidentification syndromes. *Behavioural neurology*. 2008;20(3-4):83-89.
- Hudson AJ, Grace GM. Misidentification syndromes related to face specific area in the fusiform gyrus. *Journal of Neurology, Neurosurgery & Psychiatry*. 2000;69(5):645-648.
- Jocic Z, Staton RD. Reduplication after right middle cerebral artery infarction. *Brain and cognition*. 1993;23(2):222-230.
- Kato Y, Muramatsu T, Kato M, Shibukawa Y, Shintani M, Yoshino F. Cortical reorganization and somatic delusional psychosis: a magnetoencephalographic study. *Psychiatry Research: Neuroimaging*. 2006;146(1):91-95.

- Kitabayashi Y, Narumoto J, Otakara C, Hyungin C, Fukui K, Yamada K. Schizophrenia-like psychosis following right putaminal infarction. *The Journal of neuropsychiatry and clinical neurosciences*. 2006;18(4):561.
- Klasen H, Britton J, Newman M. Moyamoya disease in a 12-year-old Caucasian boy presenting with acute transient psychosis. *European child & adolescent psychiatry*. 1999;8(2), 149-153.
- Kumral E, Öztürk Ö. Delusional state following acute stroke. *Neurology*. 2004;62(1):110-113.
- Lee K, Shinbo M, Kanai H, Nagumo Y. Reduplicative paramnesia after a right frontal lesion. *Cognitive and Behavioral Neurology*. 2011;24(1):35-39.
- Leeds L, Srinivasan J. Case Report: an unusual case of post-stroke psychosis in a 71-year-old lady with a learning disability. *British Journal of Learning Disabilities*. 2011;39(4):292-294.
- Levine DN, Grek A. The anatomic basis of delusions after right cerebral infarction. *Neurology*. 1984;34(5):577-577.
- McMurtray AM, Sultzer DL, Monserratt L, Yeo T, Mendez MF. Content-specific delusions from right caudate lacunar stroke: association with prefrontal hypometabolism. *The journal of psychiatry and clinical neurosciences*. 2008;20(1):62-67.
- Meguro K, Meguro M, Akanuma K. Recurrent delusional ideas due to left caudate head infarction, without dementia. *Psychogeriatrics*. 2012;12(1):58-61.
- Mishra NK, Hastak S. Poststroke hallucination delusion syndrome. *The Journal of neuropsychiatry and clinical neurosciences*. 2007;20(1):116-116.
- Mittal M, Khan S. Starvation causes acute psychosis due to anterior thalamic infarction. *Southern medical journal*. 2010;103(7), 701-703.
- Mobbs RJ, Chandran KN, Newcombe RL. Psychiatric presentation of aneurysmal subarachnoid haemorrhage. *ANZ journal of surgery*. 2001;71(1):69-70.
- Moriyama Y, Muramatsu T, Kato M, Mimura M, Akiyama T, Kashima H. Fregoli Syndrome Accompanied with Prosopagnosia in a Woman with a 40-year History of Schizophrenia. *Keio journal of medicine*. 2007;56(4): 130.
- Murai T, Toichi M, Sengoku A, Miyoshi K, Morimune S. Reduplicative paramnesia in patients with focal brain damage. *Cognitive and Behavioral Neurology*. 1997;10(3):190-196.
- Nagaratnam N, O'Neile L. Delusional parasitosis following occipito-temporal cerebral infarction. *General hospital psychiatry*. 2000;22(2):129-132.

- Narumoto J, Matsushima N, Oka S, Shimizu H, Kooguchi Y, Kitabayashi Y, et al. Neurobehavioral changes associated with bilateral caudate nucleus infarctions. *Psychiatry and clinical neurosciences*. 2005;59(1):109-110.
- Narumoto J, Ueda H, Tsuchida H, Yamashita T, Kitabayashi Y, Fukui K. Regional cerebral blood flow changes in a patient with delusional parasitosis before and after successful treatment with risperidone: a case report. *Progress in Neuro-Psychopharmacology and Biological Psychiatry*. 2006;30(4):737-740.
- Neetesh B, Yogaratnam J. Organic Othello Syndrome Following a Stroke: A Rare Complication. *German Journal of Psychiatry*. 2012;15(1):41-43.
- Ohara, T, Monji A, Onitsuka T, Maekawa T, Hirano Y, Hirano S, et al. Interictal psychosis after stroke with forced normalization. *The Journal of neuropsychiatry and clinical neurosciences*. 2006;18(4),557-559.
- Ortiz N, Annoni JM, Trojan D, Alberque C, Eytan A. Persistent severe depressive episode with mood-congruent psychotic features associated with left temporal ischemia. *Cognitive and behavioral neurology*. 2004;17(3),157-162.
- Pakalnis A, Drake ME, Kellum JB. Right parieto-occipital lacunar infarction with agitation, hallucinations, and delusions. *Psychosomatics*. 1987;28(2):95-96.
- Peckins CS, Khorashadi L, Wolpow ER. A Case of Reduplicative Paramnesia for Home. *Cognitive and Behavioral Neurology*. 2016;29(3),150-157.
- Perez DL, Fuchs BH, Epstein J. A case of cotard syndrome in a woman with a right subdural hemorrhage. *The Journal of neuropsychiatry and clinical neurosciences*. 2013;26(1):E29-30.
- Price BH, Mesulam M. Psychiatric manifestations of right hemisphere infarctions. *The Journal of nervous and mental disease*. 1985;173(10), 610-614.
- Rabins PV, Starkstein SE, Robinson RG. Risk factors for developing atypical (schizophreniform) psychosis following stroke. *The Journal of neuropsychiatry and clinical neurosciences*. 1991;3(1):6-9.
- Ramirez-Bermudez J, Espinola-Nadurille M, Loza-Taylor N. Delusional parasitosis in neurological patients. *General hospital psychiatry*. 2010;32(3),294-299.
- Richardson ED, Malloy PF, Grace J. Othello syndrome secondary to right cerebrovascular infarction. *Journal of geriatric psychiatry and neurology*. 1991;4(3):160-165.
- Richardson JK. Psychotic Behavior After Right Hemispheric Accident: A Case Report. *Archives of physical medicine and rehabilitation*. 1992;73:381-384.
- Rocha S, Pinho J, Ferreira C, Machado Á. Othello Syndrome After Cerebrovascular Infarction. *The Journal of neuropsychiatry and clinical neurosciences*. 2014;26(3):E1-E2.

- Routh R, Hill A. Post-stroke mania: a rare but treatable presentation. *Progress in Neurology and Psychiatry*. 2014;18(1), 24-25.
- Santos S, Alberti O, Corbalán T, Cortina MT. Stroke-psychosis. Description of two cases. *Actas Esp Psiquiatr*. 2009;37(4):240-242.
- Schnider A, Regard M, Benson DF, Landis T. Effects of a right-hemisphere stroke on an artist's performance. *Cognitive and Behavioral Neurology*. 1993;6(4), 249-255.
- Small G. Progressive motor deficits and psychosis after stroke: a case presentation. *Journal of Neuroscience Nursing*. 2016;48(2), 68-70.
- Sottile F, Bonanno L, Finzi G, Ascenti G, Marino S, Bramanti P, et al. Cotard and Capgras Syndrome after Ischemic Stroke. *Journal of Stroke and Cerebrovascular Diseases*. 2015;24(4):e103-e104.
- Spiegel DR, Laroia R, Samuels D. A possible case of Capgras syndrome after a right anterior cerebral artery cerebrovascular accident treated successfully with mirtazapine. *The Journal of neuropsychiatry and clinical neurosciences*. 2007;20(4):494-494.
- Su KP, Hsu CY, Hsieh SC, Shen WW. Magnetic resonance imaging findings in patients with delusional disorder due to diffuse cerebrovascular disease: a report of seven cases. *Psychiatry and clinical neurosciences*. 2001;55(2), 121-126.
- Suhr JA, Anderson SW. Behavioral management of chronic hallucinations and delusions following right middle cerebral artery stroke. *Psychotherapy: Theory, Research, Practice, Training*. 1998;35(4):464.
- Thiel CM, Studte S, Hildebrandt H, Huster R, Weerda R. When a loved one feels unfamiliar: a case study on the neural basis of Capgras delusion. *Cortex*. 2014;52,75-85.
- van Almenkerk S, Depla MF, Smalbrugge M, Eefsting JA, Hertogh CM. Institutionalized stroke patients: status of functioning of an under researched population. *Journal of the American Medical Directors Association*. 2012;13(7):634-639.
- van Almenkerk S, Depla MF, Smalbrugge M, Eefsting JA, Hertogh CM. Pain among institutionalized stroke patients and its relation to emotional distress and social engagement. *International journal of geriatric psychiatry*. 2015;30(10),1023-1031.
- Villarejo A, Martin VP, Moreno-Ramos T, Camacho-Salas A, Porta-Etessam J, Bermejo- Pareja, F. Mirrored-self misidentification in a patient without dementia: evidence for right hemispheric and bifrontal damage. *Neurocase*. 2011;17(3):276-284.
- Westlake RJ, Weeks SM. Pathological jealousy appearing after cerebrovascular infarction in a 25-year-old woman. *Australian and New Zealand journal of psychiatry*. 1999;33(1),105-107.

Wong A, Lau AY, Yang J, Wang Z, Liu W, Lam BY, Au L, Shi L, Wang D, Chu WC, Xiong YY, Lo ES, Law LS, Leung TW, Lam LC, Chan AY, Soo YO, Leung EY, Wong LK, Mok VC. Neuropsychiatric Symptom Clusters in Stroke and Transient Ischemic Attack by Cognitive Status and Stroke Subtype: Frequency and Relationships with Vascular Lesions, Brain Atrophy and Amyloid. *PLoS One*. 2016;11(9):e0162846.

Wong AH, Rosemary Meier HM. Case report: Delusional jealousy following right-sided cerebral infarct. *Neurocase*. 1997;3(5):391-394.

Wunderlich G, Suchan B, Volkmann J, Herzog H, Hömberg V, Seitz RJ. Visual hallucinations in recovery from cortical blindness: Imaging correlates. *Archives of Neurology*. 2000;57(4), 561-565.

Yildiz M, Pflueger M, Riecher-Rössler A, Berger G. Aneurysms of pericallosal cerebral artery haemorrhage with consecutive psychosis. *The Australian and New Zealand journal of psychiatry*. 2007;41(6):554-554.

Zhang H, Qian HZ, Meng SQ, Shu M, Gao YZ, Xu Y, et al. Psychological distress, social support and medication adherence in patients with ischemic stroke in the mainland of China. *Journal of Huazhong University of Science and Technology [Medical Sciences]*. 2015;35(3),405-410.

Zimnitsky BM, DeMaso DR, Steingard RJ. Use of risperidone in psychotic disorder following ischemic brain damage. *Journal of child and adolescent psychopharmacology*. 1996;6(1):75-7.
